# Supplementary material
Source: PubMed Central journal article supplement (PMC1091759)

**Supplemental Figure 2: Elongation of the hypocotyl of different *ago1* alleles is induced by GA**

Siblings from heterozygote plants from the different *ago1* alleles were grown *in vitro* in presence or absence of 1  $\mu$ M of GA(4+7). Hypocotyl measurements were done on 8 d old seedlings. One representative WT (Col0) is shown on the figure. Bars = SD

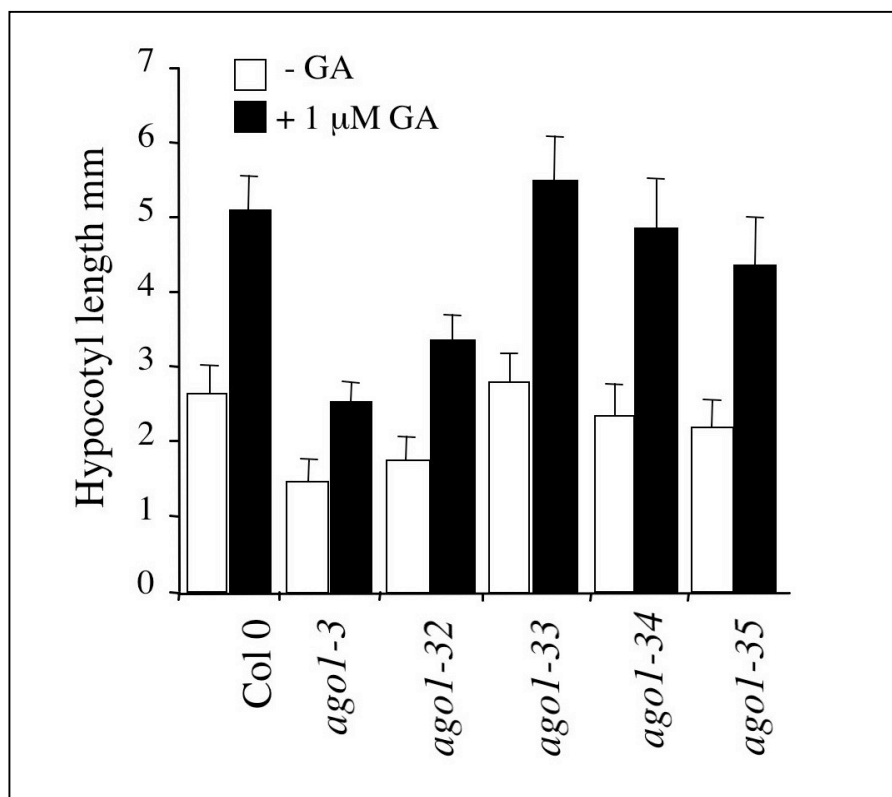

Supplement: plntcell_tpc.105.031625_2.pdf [file plntcell_tpc.105.031625_2.pdf]
