# Supplementary material
Source: PubMed Central journal article supplement (PMC1091759)

**Supplemental Figure 3: The *ago1-3* mutant responds normally to BA, ethylene, and change in photoperiod**

(A) WT (left) and *ago1-3* (right) siblings grown *in vitro* on a medium containing 10  $\mu$ M BA for 3 weeks. (B) Col0 *amp1* mutant grown *in vitro* for 4 weeks. (C) *ago1-3amp1* double mutant grown *in vitro* for 4 weeks. The allele of the cytokinin over-producer *amp1*, in Col0 ecotype, was provided by M. Laloue (INRA, Versailles). A plant heterozygote for *ago1-3* mutation was crossed with a heterozygote *amp1* plant. Double mutants were identified in the F3 progeny. (D) WT and (E) *ago1-3* siblings grown *in vitro*, in the dark for 1 week in presence of increasing concentration of ACC, a precursor of ethylene biosynthesis. (F) WT and (G) *ago1-3* siblings grown *in vitro*, in short days for 2 months. Bar = 1 cm

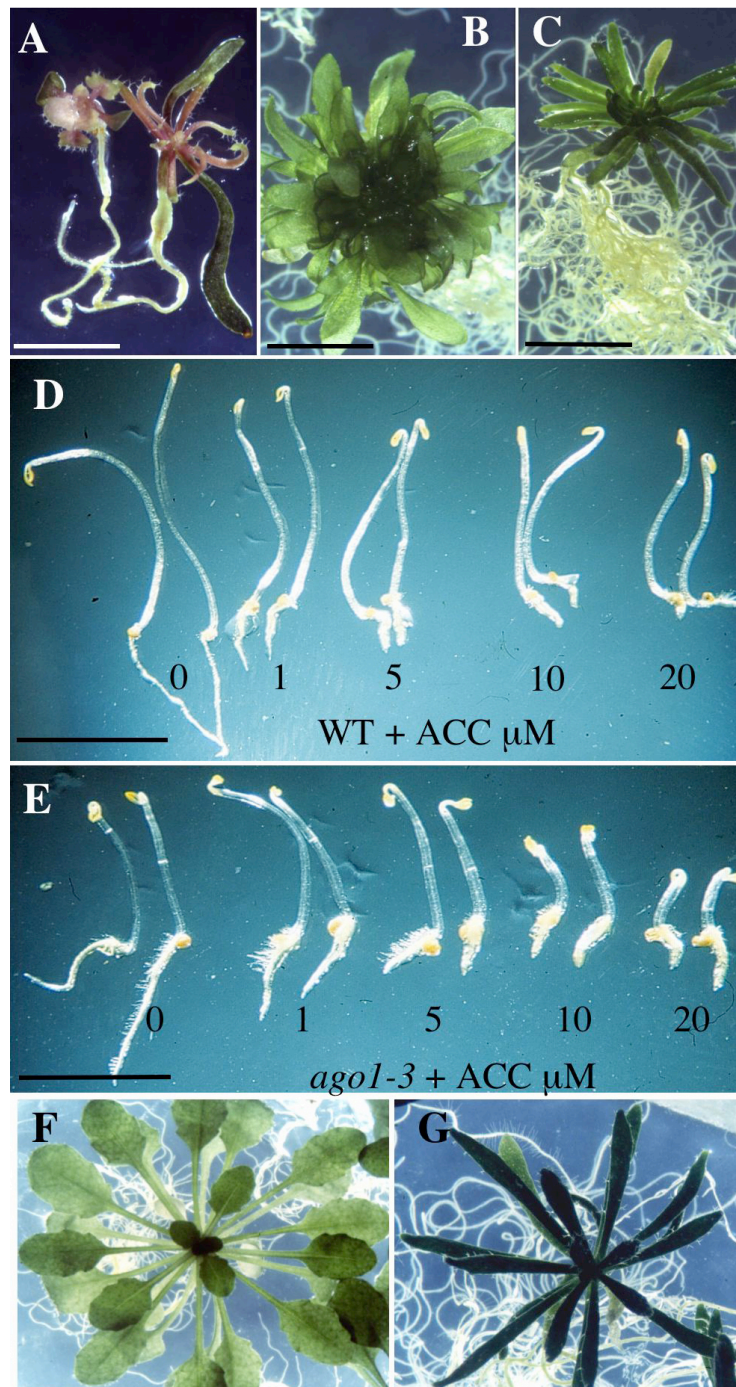

Supplement: plntcell_tpc.105.031625_3.pdf [file plntcell_tpc.105.031625_3.pdf]
