# Supplementary material
Source: PubMed Central journal article supplement (PMC1091759)
Supplement: plntcell_tpc.105.031625_4.pdf [file plntcell_tpc.105.031625_4.pdf]

**Supplemental Table 1 : Updated classification of *ago1* alleles**

| Line   | Allele                       | Mutagen | Ecotype         | Mutation                     |
|--------|------------------------------|---------|-----------------|------------------------------|
| nab1   | <i>ago1-1</i> <sup>a*</sup>  | T-DNA   | Col-2           |                              |
| dlw2   | <i>ago1-2</i> <sup>a*</sup>  | T-DNA   | WS              |                              |
| e052   | <i>ago1-3</i> <sup>a*</sup>  | EMS     | Col-0           | G42Stop                      |
| e436   | <i>ago1-4</i> <sup>a*</sup>  | EMS     | Col-0           |                              |
| e553   | <i>ago1-5</i> <sup>a*</sup>  | EMS     | Col-0           | 22bp deletion<br>C2726-G2747 |
| e691   | <i>ago1-6</i> <sup>a*</sup>  | EMS     | Col-0           |                              |
| abf27  | <i>ago1-7</i> <sup>b</sup>   | T-DNA   | WS <sup>b</sup> |                              |
|        | <i>ago1-8</i> <sup>b</sup>   | EMS     | Ld <sup>b</sup> |                              |
|        | <i>ago1-9</i> <sup>c</sup>   | EMS     | Ld <sup>c</sup> | 2bp deletion<br>C1154-T1155  |
|        | <i>ago1-10</i> <sup>d</sup>  | EMS     | Ld <sup>g</sup> | 1bp deleted<br>A1170         |
|        | <i>ago1-11</i> <sup>e</sup>  | EMS     | Ld <sup>f</sup> |                              |
|        | <i>ago1-12</i> <sup>d</sup>  | EMS     | Ld <sup>g</sup> | H763L                        |
| e1099  | <i>ago1-13</i> <sup>f*</sup> | EMS     | Col-0           | Q537stop                     |
| e1387  | <i>ago1-14</i> <sup>f*</sup> | EMS     | Col-0           | Q885Stop                     |
| 6w     | <i>ago1-15</i> <sup>f*</sup> | EMS     | Col-0           |                              |
| 7r     | <i>ago1-16</i> <sup>f*</sup> | EMS     | Col-0           |                              |
| 8t     | <i>ago1-17</i> <sup>f*</sup> | EMS     | Col-0           |                              |
| 14b    | <i>ago1-18</i> <sup>f*</sup> | EMS     | Col-0           | P493S                        |
| acx7   | <i>ago1-19</i> <sup>f*</sup> | T-DNA   | WS              |                              |
| dsv1   | <i>ago1-20</i> <sup>f*</sup> | T-DNA   | WS              |                              |
| dyp79  | <i>ago1-21</i> <sup>f*</sup> | T-DNA   | WS              |                              |
| 23-1   | <i>ago1-22</i> <sup>g</sup>  | EMS     | Col-0           |                              |
| 46-3   | <i>ago1-23</i> <sup>g</sup>  | EMS     | Col-0           |                              |
| 60-1   | <i>ago1-24</i> <sup>g</sup>  | EMS     | Col-0           | L571F                        |
| 19-3   | <i>ago1-25</i> <sup>h</sup>  | EMS     | Col-0           | G758S                        |
| 33-2   | <i>ago1-26</i> <sup>h</sup>  | EMS     | Col-0           | P838S                        |
| 69-4   | <i>ago1-27</i> <sup>h</sup>  | EMS     | Col-0           | A992S                        |
| e965   | <i>ago1-28</i> <sup>f*</sup> | EMS     | Col-0           |                              |
| e1174  | <i>ago1-29</i> <sup>f*</sup> | EMS     | Col-0           |                              |
| dwy4   | <i>ago1-30</i> <sup>f*</sup> | T-DNA   | WS              |                              |
| eai70  | <i>ago1-31</i> <sup>f</sup>  | T-DNA   | WS              |                              |
| 13-5   | <i>ago1-32</i> <sup>f</sup>  | EMS     | Col-0           |                              |
| 6-5    | <i>ago1-33</i> <sup>f</sup>  | EMS     | Col-0           |                              |
| 450-3  | <i>ago1-34</i> <sup>f</sup>  | FNM     | Col-0           |                              |
| 450-16 | <i>ago1-35</i> <sup>f</sup>  | FNM     | Col-0           |                              |

a - Bohmert *et al.* (1998), b - Lynn *et al.* (1999), c - Lippman *et al.* (2003),  
d - Kidner *et al.* (2004), e - Kidner *et al.* (2003), f- Sorin *et al.* this issue, g  
- Fagard *et al.* (2000), h - Morel *et al.* (2002)

\* analysed on western blot (supplemental fig1)

In a forward genetic screen of EMS mutagenized lines and T-DNA insertion lines we identified 21 *argonaute1* alleles showing a strong phenotype (Camus 1999). Some of these alleles had to be renamed, because of the recent publication of new alleles (Kidner and Martienssen 2003; Kidner and Martienssen 2004). An updated nomenclature for our *ago1* alleles and their origin is provided here. The first six alleles (*ago1-1* to *ago1-6*) were described in (Bohmert et al. 1998). Fourteen of the other alleles, which showed a similar, strong phenotype, were considered as strong alleles. The allele *ago1-18* gave rise to a slightly weaker phenotype. The mutation was identified in five of the EMS alleles. These include our reference mutant *ago1-3*, *ago1-18* that had the WT size protein, and three alleles showing truncated proteins (STable1). The *ago1-3* mutation induces an early STOP codon in position G42, confirming that it is a null allele. The truncated proteins are likely to be inactive as they certainly lack the conserved PIWI and/or PAZ domain as confirmed by the sequence analysis for three of the alleles. The *ago1-18* sequence showed a single amino-acid change (P493S). Interestingly this is the exact same mutation as observed in the allele *zll1-16* of the *ZWILLE/PINHEAD* gene (Moussian et al. 1998), and that also leads to a milder phenotype (Moussian personal communication). Although *ago1-18* had a weaker phenotype than the null alleles, it was still stronger than that of the hypomorphic *ago1* mutants described by Morel et al. (2002) highlighting the importance of that particular amino-acid for the protein functionality. The *ago1-5* sequence showed a frame-shift 22 bp deletion that created a STOP codon leading to the deletion of the C-terminus part of the protein including part of the PIWI domain.

- Bohmert, K., Camus, I., Bellini, C., Bouchez, D., Caboche, M., and Benning, C. (1998). *AGO1* defines a novel locus of Arabidopsis controlling leaf development. *Embo J* **17**, 170-80.
- Camus, I. (1999). *ARGONAUTE* d'Arabidopsis thaliana Définit une Famille de Gènes Conservés chez les Eucaryotes, Impliqués dans le Développement. PhD thesis, pp. 127. Université Pierre et Marie Curie, Paris, France.
- Fagard, M., Boutet, S., Morel, J.B., Bellini, C., and Vaucheret, H. (2000). AGO1, QDE-2, and RDE-1 are related proteins required for post-transcriptional gene silencing in plants, quelling in fungi, and RNA interference in animals. *Proc Natl Acad Sci U S A* **97**, 11650-4.
- Kidner, C.A. and Martienssen, R.A. (2003). Macro effects of microRNAs in plants. *Trends Genet* **19**, 13-6.
- Kidner, C.A. and Martienssen, R.A. (2004). Spatially restricted microRNA directs leaf polarity through ARGONAUTE1. *Nature* **428**, 81-4.
- Lippman, Z., May, B., Yordan, C., Singer, T., and Martienssen, R. (2003). Distinct Mechanisms Determine Transposon Inheritance and Methylation via Small Interfering RNA and Histone Modification. *PLoS Biol* **1**, E67.
- Lynn, K., Fernandez, A., Aida, M., Sedbrook, J., Tasaka, M., Masson, P., and Barton, M.K. (1999). The PINHEAD/ZWILLE gene acts pleiotropically in Arabidopsis development and has overlapping functions with the ARGONAUTE1 gene. *Development* **126**, 469-81.
- Morel, J.B., Godon, C., Mourrain, P., Beclin, C., Boutet, S., Feuerbach, F., Proux, F., and Vaucheret, H. (2002). Fertile hypomorphic *ARGONAUTE* (*ago1*) mutants impaired in post-transcriptional gene silencing and virus resistance. *Plant Cell* **14**, 629-39.
- Moussian, B., Schoof, H., Haecker, A., Jürgens, G., and Laux, T. (1998). Role of the *ZWILLE* gene in the regulation of central meristem cell fate during *Arabidopsis* embryogenesis. *EMBO J.* **17**, 1799-1809.
